# Supplementary material
Source: publisher figshare collection journal article supplement (https://sage.figshare.com/ndownloader/files/17505317)
Supplement: Supplementary file 1 [file 17505317]

## Online appendix for: Trade connections' effect on European regions' interest in Brexit

Robert Urbatsch, Department of Political Science, Iowa State University, Ames, IA, US

Table A1. Variable summary statistics.

|                                                     | N   | Mean  | Standard<br>Deviation | Min   | Max   |
|-----------------------------------------------------|-----|-------|-----------------------|-------|-------|
| Brexit search score, 2017–2018                      | 123 | 65.1  | 21.8                  | 16    | 100   |
| UK trade exposure as share of labor income (logged) | 123 | -4.31 | 0.868                 | -5.81 | -2.71 |
| UK trade exposure as share of GDP (logged)          | 123 | -4.23 | 0.823                 | -5.52 | -2.81 |
| Overnight foreigner visits per capita               | 117 | 0.343 | 1.36                  | -2.81 | 4.01  |
| Distance to London (km, logged)                     | 123 | 7.07  | 0.529                 | 5.59  | 8.03  |
| National capital                                    | 123 | 0.106 | 0.309                 | 0     | 1     |
| ISCED education levels 0 to 2 (%)                   | 123 | 24.9  | 13.4                  | 2.8   | 57.8  |
| ISCED education levels 3 to 4 (%)                   | 123 | 45.8  | 13.5                  | 17.2  | 73    |
| Per capita income (% EU average)                    | 123 | 99.1  | 33.1                  | 47    | 202   |
| Population per km <sup>2</sup> (logged)             | 123 | 5.19  | 1.14                  | 3.25  | 8.91  |

---

Table A2. Relative public interest in Brexit among European regions, 2016–2018.

|                                       | Trade as share of labor income |                   | Trade as share of GDP |                    |
|---------------------------------------|--------------------------------|-------------------|-----------------------|--------------------|
| UK trade exposure                     | 0.448<br>(13.019)              | -4.160<br>(7.290) | -5.417<br>(16.436)    | -12.610<br>(9.398) |
| Overnight foreigner visits per capita |                                | 6.558*<br>(1.333) |                       | 6.549*<br>(1.292)  |
| Distance to London (km)               |                                | 1.071<br>(5.426)  |                       | 0.353<br>(5.299)   |
| National capital                      |                                | 6.766<br>(4.191)  |                       | 6.697<br>(4.152)   |
| ISCED education levels 0 to 2 (%)     |                                | 0.224<br>(0.325)  |                       | 0.197<br>(0.317)   |
| ISCED education levels 3 to 4 (%)     |                                | 0.254<br>(0.404)  |                       | 0.237<br>(0.390)   |
| Per capita income (% EU average)      |                                | 0.300*<br>(0.086) |                       | 0.293*<br>(0.085)  |
| Population per km <sup>2</sup>        |                                | 1.983<br>(1.956)  |                       | 2.175<br>(1.938)   |
| Country fixed effects                 | Yes                            | Yes               | Yes                   | Yes                |
| N                                     | 123                            | 117               | 123                   | 117                |

*Note:* \* indicates (two-tailed)  $p < 0.05$ ; robust standard error in parentheses.

---

Table A3. Relative public interest in Brexit among European regions, 2017–2018, including interaction between regional economic dependence on the United Kingdom and local educational attainment.

|                                             | Trade as share of labor income | Trade as share of GDP |
|---------------------------------------------|--------------------------------|-----------------------|
| UK trade exposure                           | -2.387<br>(27.195)             | 2.655<br>(31.481)     |
| UK trade exposure × education levels 0 to 2 | 0.115<br>(0.364)               | 0.031<br>(0.379)      |
| UK trade exposure × education levels 3 to 4 | -0.456<br>(0.362)              | -0.664<br>(0.407)     |
| Overnight foreigner visits per capita       | 7.255*<br>(1.565)              | 7.421*<br>(1.516)     |
| Distance to London (km)                     | -3.780<br>(8.489)              | -4.207<br>(8.342)     |
| National capital                            | 9.082<br>(5.059)               | 9.806<br>(5.012)      |
| ISCED education levels 0 to 2 (%)           | 1.159<br>(1.767)               | 0.769<br>(1.750)      |
| ISCED education levels 3 to 4 (%)           | -1.535<br>(1.575)              | -2.439<br>(1.688)     |
| Per capita income (% EU average)            | 0.240*<br>(0.093)              | 0.216*<br>(0.095)     |
| Population per km <sup>2</sup>              | 2.250<br>(1.673)               | 2.096<br>(1.697)      |
| Country fixed effects                       | Yes                            | Yes                   |
| N                                           | 117                            | 117                   |

*Note:* \* indicates (two-tailed)  $p < 0.05$ ; robust standard error in parentheses.
